# Supplementary material for: Genome-wide analysis of Dof transcription factors and their response to cold stress in rice (Oryza sativa L.)
Source: PubMed Central journal article supplement (PMC8572462; doi:10.1186/s12864-021-08104-0), 2021-11-06

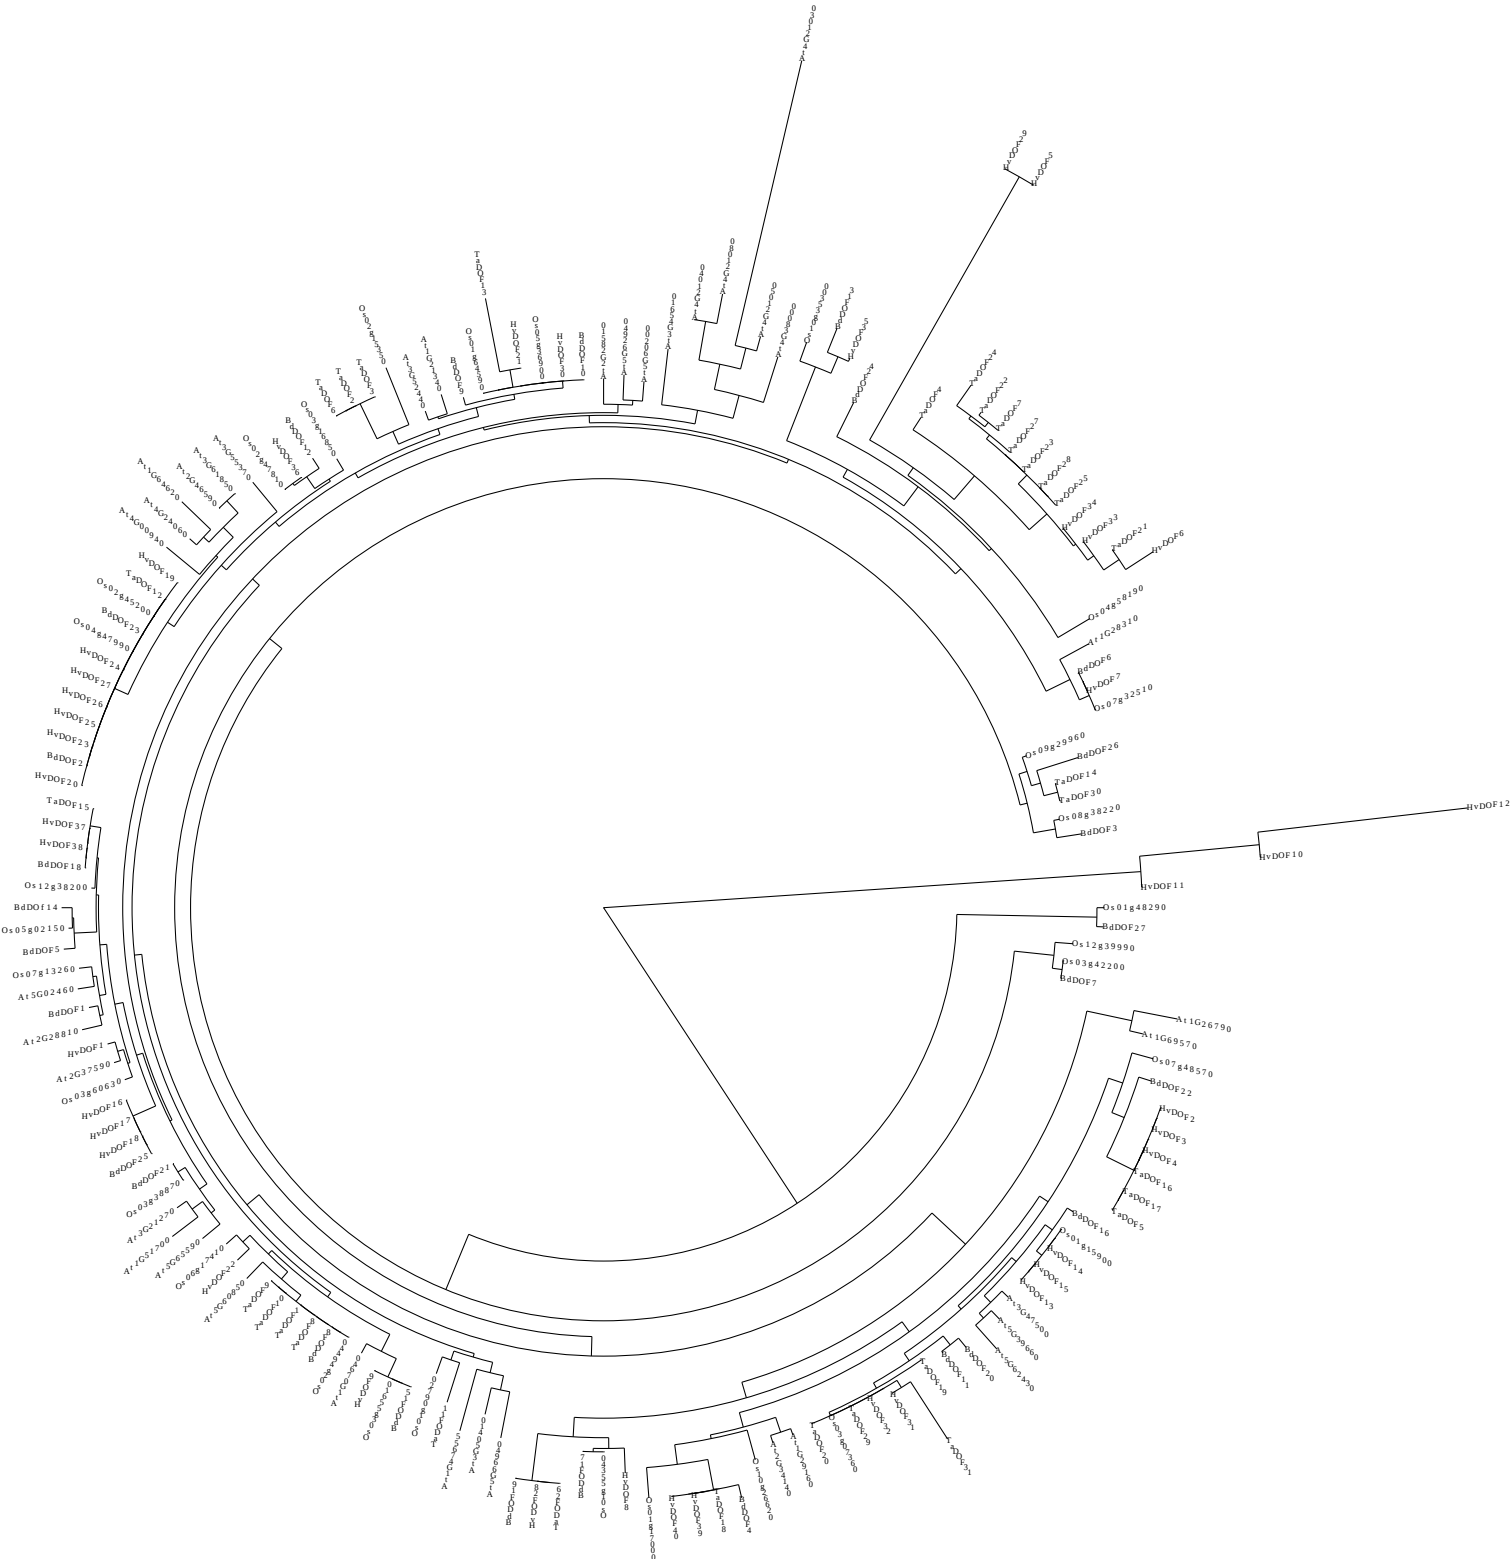

Supplement: 12864_2021_8104_MOESM1_ESM.pdf [file 12864_2021_8104_MOESM1_ESM.pdf]
